# Supplementary material for: Deficiency of ChPks and ChThr1 Inhibited DHN-Melanin Biosynthesis, Disrupted Cell Wall Integrity and Attenuated Pathogenicity in Colletotrichum higginsianum
Source: MDPI journal article supplement (doi:10.3390/ijms242115890), 2023-11-02
Supplement: s1 [file s1]

# Deficiency of ChPks and ChThr1 Inhibited DHN-Melanin Biosynthesis, Disrupted Cell Wall Integrity and Attenuated Pathogenicity in *Colletotrichum higginsianum*

Lingtao Duan <sup>†</sup>, Li Wang <sup>†</sup>, Weilun Chen, Zhenrui He, Erxun Zhou <sup>\*</sup> and Yiming Zhu <sup>\*</sup>

Guangdong Province Key Laboratory of Microbial Signals and Disease Control, College of Plant Protection, South China Agricultural University, Guangzhou 510642, China

<sup>\*</sup> Correspondence: Correspondence: exzhou@scau.edu.cn (E.Z.); zhu\_yiming1992@scau.edu.cn (Y.Z.); Tel./Fax: +86-20-8528-6089 (E.Z.)

<sup>†</sup> These authors contributed equally to this work.

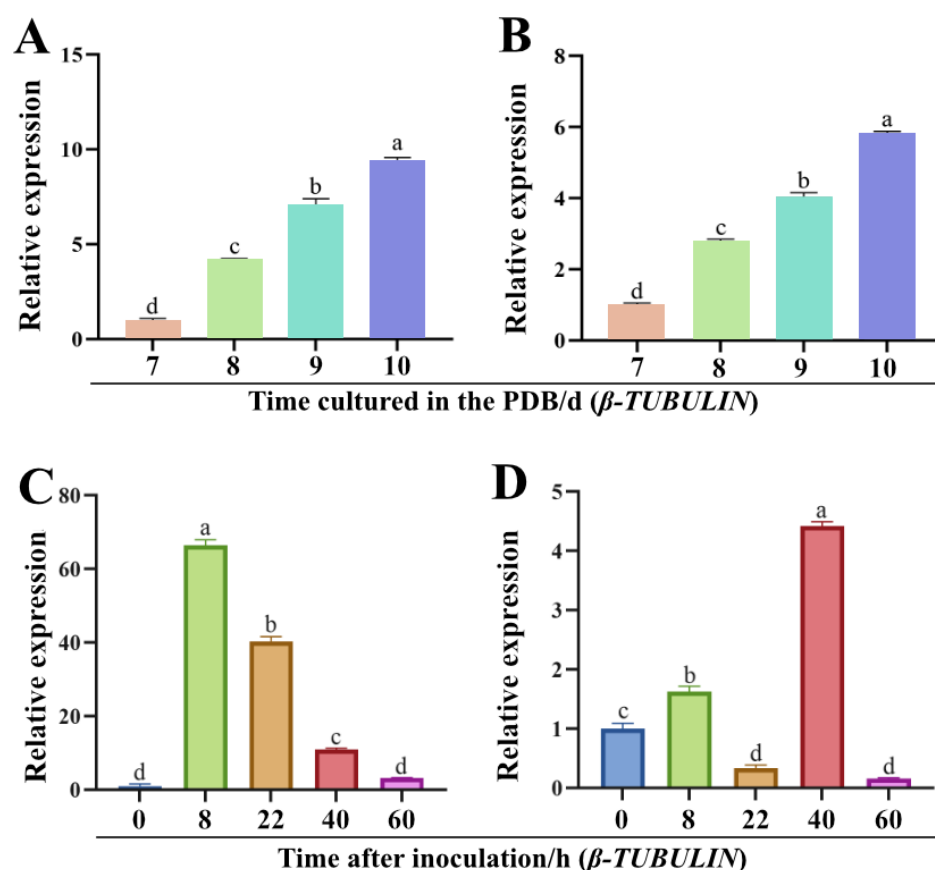

**Figure S1.** Expression analyses of genes *ChPKS* and *ChTHR1* during hypha and appressorium melanization of *Colletotrichum higginsianum*. (A,B) Expression patterns of genes *ChPKS* and *ChTHR1* during hypha melanization with  $\beta$ -TUBULIN as the endogenous reference gene. (C,D) Expression patterns of genes *ChPKS* and *ChTHR1* during appressorium melanization with  $\beta$ -TUBULIN as the endogenous reference gene. Error bars represent standard deviations from three replicates, experimental data were analyzed by One-way ANOVA. Different letters indicate a significant difference at  $p < 0.05$ .

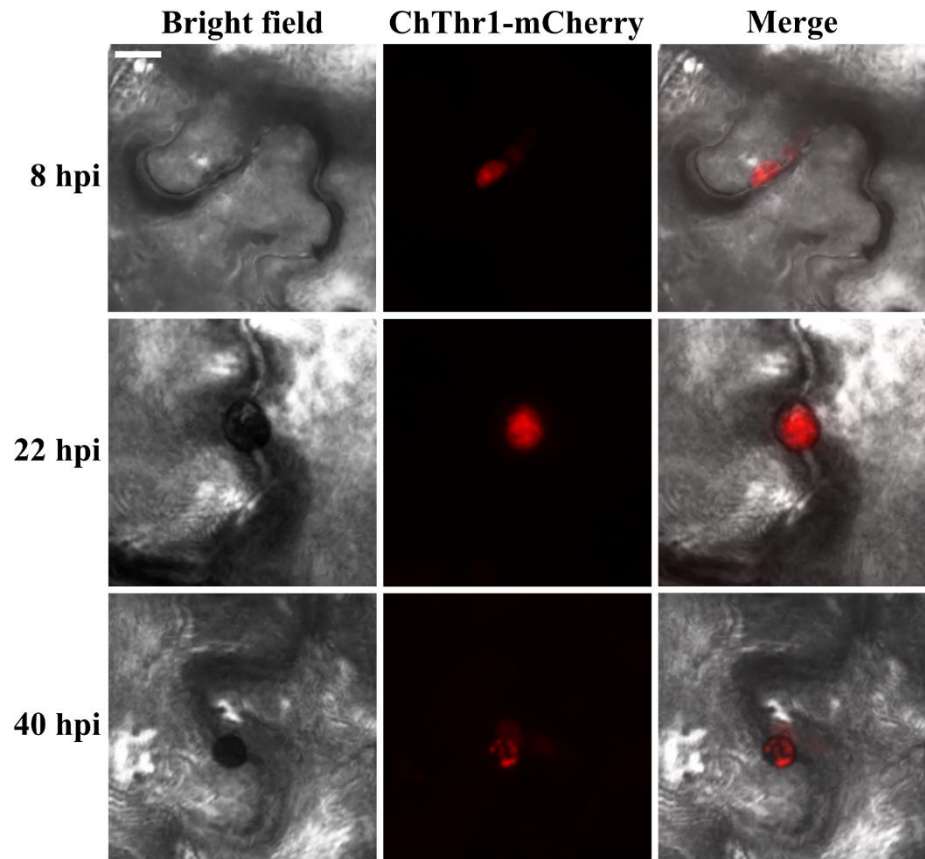

**Figure S2.** Fluorescence microscopy images of the ChThr1-mCherry during infection of *Colletotrichum higginsianum*. Images were analyzed by confocal microscopy to detect the mCherry signal at different time points during infection. Scale bar = 10  $\mu$ m.

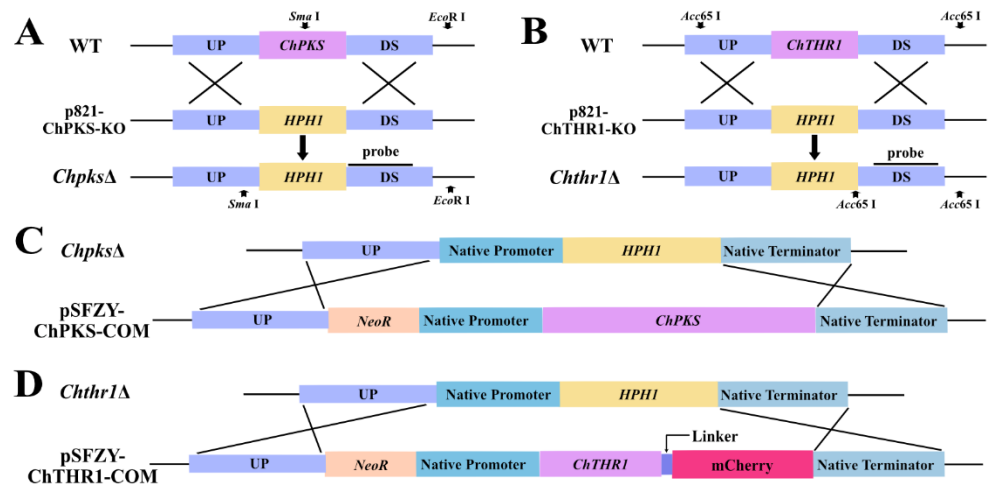

**Figure S3.** Targeted gene knockout and complementation of *ChPKS* and *ChTHR1* in *Colletotrichum higginsianum*. (A,B) Schematic map illustrating the construction of gene knockout vectors for genes *ChPKS* and *ChTHR1*, including restriction enzyme sites within the genomic region of interest. A bold line below the disruption construct represents the sequence used as a probe in Southern blot analysis. (C,D) Schematic map illustrating the construction of gene complementation vectors for genes *ChPKS* and *ChTHR1*.

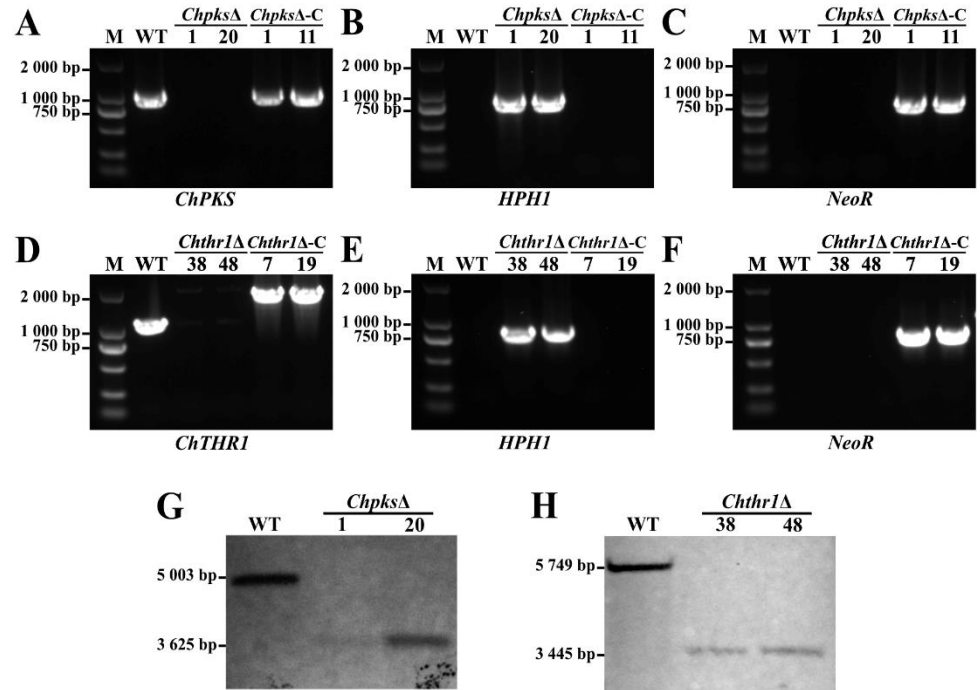

**Figure S4.** PCR and Southern blotting validation of the *ChpksΔ* and *Chthr1Δ* mutants of *Colletotrichum higginsianum*. (A–C) PCR products were amplified from WT, *ChpksΔ* and *ChpksΔ*-C strains using primer pairs PKS-F/R, HPH1-F/R and NeoR-F/R. (D–F) PCR products were amplified from WT, *Chthr1Δ* and *Chthr1Δ*-C strains using primer pairs PKS-F/R, HPH1-F/R and NeoR-F/R. (G) Southern blotting analysis of the WT and *ChpksΔ* strains. (H) Southern blotting analysis of the WT and *Chthr1Δ* strains.

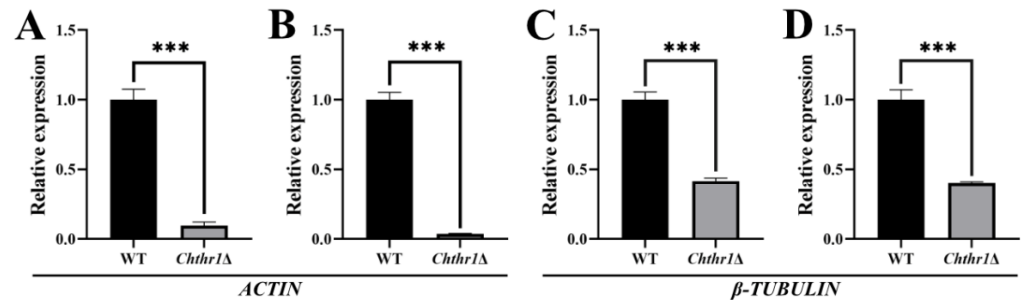

**Figure S5.** Expression analysis of gene *ChTHNR* of *Colletotrichum higginsianum* at 4 d (A,C) and 7 d (B,D) of culture in the *Chthr1Δ* mutant. Error bars represent standard deviations from three replicates. The experimental data were analyzed by One-way ANOVA. \*\*\* indicate  $p < 0.001$ .
